# Supplementary material
Source: bioRxiv or medRxiv preprint supplement (https://www.biorxiv.org/highwire/filestream/140878/field_highwire_adjunct_files/6/470393-7.pdf)
Supplement: Supplementary file [file 470393-7.pdf]

Link to visualize Movies:

[https://www.dropbox.com/sh/1x9q60g13ke5eyo/AACSDRIJK8mmk4q\\_9TbOEKK3a?dl=0](https://www.dropbox.com/sh/1x9q60g13ke5eyo/AACSDRIJK8mmk4q_9TbOEKK3a?dl=0)

List of Movies:

Movie 1 - Axonal trafficking of exogenous cy3-labeled pre-miR-181a-1 (stage 26/27)

Movie 2 - Axonal trafficking of the endogenous MB-labeled pre-miR-181a-1 (stage 26/27)

Movie 3 - Axonal co-trafficking of MB-labeled pre-miR-181a-1 and CD63-GFP vesicles (stage 26/27)

Movie 4 - Axonal co-trafficking of MB-labeled pre-miR-181a-1 and CD63-GFP vesicles (stage 37/38)
